# Supplementary material
Source: HighWire-hosted journal article supplement (https://www.cmajopen.ca/highwire/filestream/80867/field_highwire_adjunct_files/1/open-2015-0061-2-at.pdf)
Supplement: open-2015-0061-2-at.pdf [file open-2015-0061-2-at.pdf]

**Appendix 2 (as supplied by the authors): List of hand searched conference proceedings**

1. American Association of Neurological Surgeons
2. European Association of Neurosurgical Societies
3. Société de Neurochirurgie de Langue Française
4. Congress of Neurological Surgeons
5. Critical Care Canada Forum
6. International Trauma Anesthesia and Critical Care Society
7. World Federation of Societies of Intensive and Critical Care Medicine
8. Society of Critical Care Medicine
9. European Society of Intensive Care Medicine
10. International Symposium on Intensive Care Medicine
11. American Association for the Surgery of Trauma

Appendix to: Mercier E, Boutin A, Shemilt M, et al. Predictive value of neuron-specific enolase for prognosis in patients with moderate or severe traumatic brain injury: a systematic review and meta-analysis. *CMAJ Open* 2016.

DOI:10.9778/cmajo.20150061. Copyright © 2016 The Author(s) or their employer(s).

To receive this resource in an accessible format, please contact us at [cmajgroup@cmaj.ca](mailto:cmajgroup@cmaj.ca).
